# Supplementary material
Source: PubMed Central journal article supplement (PMC4928633)
Supplement: NIHMS768827-supplement-supplemental_material.pdf [file NIHMS768827-supplement-supplemental_material.pdf]

## Supplemental Material

*Circulating biomarkers of dairy fat and risk of incident diabetes mellitus among US men and women in two large prospective cohorts*

**Table S1. Fatty acids measured by gas-liquid chromatography and methodology to compute their relative concentrations.\***

|                 | Code | Carbon Name        | Systematic Name        | Trivial Name                                      |
|-----------------|------|--------------------|------------------------|---------------------------------------------------|
| Saturated       | Sa   | 8:0                | Octanoic Acid          |                                                   |
|                 | Sb   | 10:0               | Decanoic Acid          |                                                   |
|                 | S1   | 12:0               | Dodecanoic Acid        | Lauric Acid, Laurosteanic Acid                    |
|                 | Sc   | 13:0               | Tridecanoic Acid       |                                                   |
|                 | S2   | 14:0               | Tetradecanoic Acid     | Myristic Acid                                     |
|                 | S3   | 15:0               | Pentadecanoic Acid     |                                                   |
|                 | S4   | 16:0               | Hexadecanoic Acid      | Palmitic Acid, Aethalic Acid                      |
|                 | S5   | 17:0               | Heptadecanoic Acid     | Margaric Acid, Daturinic Acid                     |
|                 | S6   | 18:0               | Octadecanoic Acid      | Stearic Acid                                      |
|                 | S7   | 19:0               | Nonadecanoic Acid      |                                                   |
|                 | S8   | 20:0               | Eicosanoic Acid        | Arachidic Acid, Icosanoic Acid, Arachic Acid      |
|                 | S9   | 21:0               | Heneicosanoic Acid     |                                                   |
| S10             | 22:0 | Docosanoic Acid    | Behenic Acid           |                                                   |
| S11             | 23:0 | Tricosanoic Acid   |                        |                                                   |
| S12             | 24:0 | Tetracosanoic Acid | Lignoceric Acid        |                                                   |
| Monounsaturated | M1   | 14:1n-5c           | 9c-Tetradecenoic Acid  | Mysristoleic Acid                                 |
|                 | M2   | 15:1n-5c           | 10c-Pentadecenoic Acid | from 14:1n-5                                      |
|                 | M3   | 16:1n-7c           | 9c-Hexadecenoic Acid   | Palmitoleic Acid, Zoomaric Acid, Physetoleic Acid |
|                 | M4   | 17:1n-7c           | 10c-Heptadecenoic Acid | from 16:1n-7                                      |
|                 | M5   | 18:1n-12c          | 6c-Octadecenoic Acid   | Petroselinic Acid                                 |
|                 | M6   | 18:1n-9c           | 9c-Octadecenoic Acid   | Oleic Acid, Rapinic Acid                          |
|                 | M7   | 18:1n-7c           | 11c-Octadecenoic Acid  |                                                   |
|                 | M8   | 19:1n-9c           | 10c-Nonadecenoic Acid  | from 18:1n-9                                      |
|                 | M9   | 20:1n-12c          | 8c-Eicosenoic Acid     | from 18:1(n-12)                                   |

|                          | <b>Code</b> | <b>Carbon Name</b> | <b>Systematic Name</b>                     | <b>Trivial Name</b>                                      |
|--------------------------|-------------|--------------------|--------------------------------------------|----------------------------------------------------------|
|                          | M10         | 20:1n-9c           | 11c-Eicosenoic Acid                        | Gondoic Acid                                             |
|                          | M11         | 20:1n-7            | 13ct-Eicosenoic                            | from 16:1n-7                                             |
|                          | M12         | 24:1n-9c           | 15c-Tetrasenoic Acid                       | Nervonic Acid, Selacholeic Acid                          |
| Polyunsaturated- Omega-3 | P3          | 18:3n-3c           | 9c,12c,15c-Octadecatrienoic Acid           | Alpha-linolenic Acid                                     |
|                          | P7          | 20:3n-3c           | 11c,14c,17c-Eicosatrienoic Acid            | from 18:3(n-3)                                           |
|                          | P10         | 20:5n-3c           | 5c,8c,11c,14c17c-Eicosapentaenoic Acid     | EPA, Timnodonic Acid                                     |
|                          | P11         | 22:3n-3c           | 13c,16c19c-Docosantrienoic Acid            |                                                          |
|                          | P13         | 22:5n-3c           | 7c,10c,13c,16c,19c-Docosapentaenoic Acid   | DPA                                                      |
|                          | P14         | 22:6n-3c           | 4c,7c,10c,13c,16c,19c-Docosahexaenoic Acid | DHA, Cervanic Acid                                       |
| Polyunsaturated- Omega-6 | P1          | 18:2n-6cc          | 9c,12c-Octadecadienoic Acid                | Linoleic Acid, Leinic Acid, Telfairic Acid, Linolic Acid |
|                          | P2          | 18:3n-6c           | 6c,9c,12c-Octadecatrienoic Acid            | Gamma-linolenic Acid, Gamolenic Acid                     |
|                          | P5          | 20:2n-6c           | 11c,14c-Eicosadienoic Acid                 |                                                          |
|                          | P6          | 20:3n-6c           | 8c,11c,14c-Eicosatrienoic Acid             | Dihomogammalinolenic Acid                                |
|                          | P8          | 20:4n-6c           | 5c,8c,111c,14c-Eicosatetraenoic Acid       | Arachidonic Acid                                         |
|                          | P9          | 22:2n-6c           | 13c,16c-Docosadienoic Acid                 | from 20:2(n-6)                                           |
|                          | P12         | 22:4n-6c           | 7c,10c,13c,16c-Docosatetraenoic Acid       | Aolrenic Acid                                            |
| Trans                    | T1          | 14:1n-5t           | 9t-Tetradecenoic Acid                      | Myristelaidic Acid                                       |
|                          | T2          | 16:1n-7t           | 9t-Hexadecenoic Acid                       | Palmitelaidic Acid                                       |
|                          | T3          | 18:1n-12t          | 6t-Octadecenoic Acid                       | Petroselaidic Acid, Tarelaidinic Acid                    |
|                          | T4          | 18:1n-9t           | 9t-Octadecenoic Acid                       | Elaidic Acid                                             |
|                          | T5          | 18:1n-7t           | 11t-Octadecenoic Acid                      | Vaccenic Acid                                            |
|                          | T6          | 18:2n-6t           | 9t,12t-Octadecadienoic Acid                | Linolelaidic Acid                                        |
|                          | T7          | 18:2n-6ct          | 9c,12t-Octadecadienoic Acid                |                                                          |
|                          | T8          | 18:2n-6tc          | 9t,12c-Octadecadienoic Acid                |                                                          |
|                          | T9          | 18:3n-3t           | 9t,12t,15t-Octadecatrienoic Acid           | from 18:3(n-3)c                                          |
|                          | T10         | 20:1n-9t           | 11t-Eicosenoic Acid                        |                                                          |
|                          | T11         | 20:2n-6t           | 11t,14t-Eicosadienoic Acid                 | from 20:2(n-6)c                                          |
| Others                   | P4          | 18:2n-7c           | 9c,11t-Octadecadienoic Acid                | CLA (C14), Rumenic Acid                                  |
|                          | U3          |                    |                                            |                                                          |
|                          | C2          |                    | believed to be trans                       |                                                          |

| <b>Code</b> | <b>Carbon Name</b> | <b>Systematic Name</b> | <b>Trivial Name</b> |
|-------------|--------------------|------------------------|---------------------|
| U12         |                    | believed to be trans   |                     |
| U13         |                    | believed to be trans   |                     |
| U14         |                    | believed to be trans   |                     |

\*The fatty acid identification chart lists the fatty acids identified. Peaks that were below the detection limit were scored as a zero (0). From this list, we identified 57 peaks (pre-2009) whose chromatogram area was summed to constitute the total peak area (denominator) and then each individual peak was expressed in units of normalized area percent (i.e. percent of the total peak area). The total number of fatty acids evaluated post-2009 was 40 because fatty acids with almost always below detectable limits were removed, and several trans-isomers were summed together into a single variable.

## **METHODS**

### **Details of ascertainment of covariates and other risk factors**

Data on medical history, major risk factors and lifestyle habits were obtained in both cohorts via validated self-administered questionnaires, including on smoking and physical activity.<sup>1-4</sup> Usual alcohol use and dietary habits over the last year were assessed through validated semi-quantitative food frequency questionnaire.<sup>5,6</sup> Self-reported height and weight were used to calculate body mass index (BMI), after confirming high age-adjusted correlation coefficients with technician-measured values height and weight (NHS and HPFS:  $r=0.97$ ).<sup>7</sup> Family history of myocardial infarction (MI) or diabetes and (in women) menopausal status and postmenopausal hormone use were assessed through validated self-report. Hypercholesterolemia and hypertension were evaluated by self-report, with high demonstrated validity as compared with medical records in random subsamples.<sup>8,9</sup>

**Table S2. Multivariable adjusted baseline characteristics of 3,333 US men and women with fatty acid measurements and free of prevalent diabetes in the Nurses' Health Study and Health Professionals Follow-Up Study cohorts (pooled) according to quartiles of total plasma fatty acid biomarkers of dairy fat.**

|                                    | Quartiles of 15:0 |      |      |      | P-trend |
|------------------------------------|-------------------|------|------|------|---------|
|                                    | Q1                | Q2   | Q3   | Q4   |         |
| Median, % of total fatty acids     | 0.11              | 0.14 | 0.16 | 0.21 | -       |
| Age, years                         | 62.1              | 62.2 | 62.2 | 62.2 | 0.92    |
| Sex, % male                        | 14.3              | 19.9 | 29.4 | 37.0 | <0.01   |
| Race, % Caucasian                  | 98.4              | 98.3 | 98.0 | 99.0 | 0.22    |
| Body mass index, kg/m <sup>2</sup> | 25.3              | 25.6 | 25.9 | 25.3 | 0.98    |
| Overweight or obese, %             | 46.9              | 48.8 | 54.9 | 47.6 | 0.71    |
| Current smoking, %                 | 10.9              | 8.5  | 9.6  | 9.3  | 0.50    |
| Physical activity, MET-hours/week  | 24.8              | 25.8 | 24.8 | 24.7 | 0.77    |
| Hypertension, %                    | 23.6              | 22.0 | 22.3 | 19.0 | 0.05    |
| Hypercholesterolemia, %            | 34.7              | 31.7 | 28.6 | 25.8 | <0.001  |
| Parental MI before 60 y, %         | 17.9              | 13.6 | 16.9 | 13.0 | 0.05    |
| Family history of diabetes, %      | 22.5              | 25.4 | 24.0 | 26.2 | 0.21    |
| Total dairy, servings/day          | 1.9               | 2.0  | 2.1  | 2.3  | <0.001  |
| Whole fat dairy, servings/day      | 0.77              | 0.83 | 0.99 | 1.21 | <0.001  |
| Low fat dairy, servings/day        | 1.2               | 1.2  | 1.1  | 1.1  | 0.07    |
| Processed meats, servings/day      | 0.29              | 0.26 | 0.24 | 0.25 | 0.01    |
| Unprocessed meats, servings/day    | 0.96              | 0.92 | 0.91 | 0.88 | <0.001  |
| Fruits, servings/day               | 1.7               | 1.8  | 1.7  | 1.7  | 0.73    |
| Vegetables, servings/day           | 4.1               | 4.0  | 4.0  | 3.7  | <0.001  |
| Fish, servings/day                 | 0.30              | 0.30 | 0.30 | 0.25 | <0.01   |
| Alcohol, servings/day              | 1.00              | 0.77 | 0.59 | 0.37 | <0.001  |

|                                    | Quartiles of 17:0 |      |      |      | P-trend |
|------------------------------------|-------------------|------|------|------|---------|
|                                    | Q1                | Q2   | Q3   | Q4   |         |
| Median, % of total fatty acids     | 0.25              | 0.30 | 0.33 | 0.39 | -       |
| Age, years                         | 61.9              | 62.0 | 62.4 | 62.5 | 0.06    |
| Sex, % male                        | 18.2              | 27.8 | 24.4 | 29.3 | 0.05    |
| Race, % Caucasian                  | 98.4              | 98.5 | 98.6 | 98.3 | 0.91    |
| Body mass index, kg/m <sup>2</sup> | 25.8              | 25.8 | 25.5 | 25.0 | <0.001  |
| Overweight or obese, %             | 52.0              | 53.0 | 49.4 | 44.5 | <0.01   |
| Current smoking, %                 | 11.7              | 8.4  | 9.0  | 9.3  | 0.20    |
| Physical activity, MET-hours/week  | 25.4              | 25.5 | 25.2 | 23.9 | 0.28    |
| Hypertension, %                    | 24.1              | 20.0 | 23.2 | 19.5 | 0.15    |
| Hypercholesterolemia, %            | 35.2              | 30.6 | 28.4 | 26.3 | <0.001  |
| Parental MI before 60 y, %         | 17.4              | 15.2 | 15.7 | 13.2 | 0.04    |
| Family history of diabetes, %      | 24.2              | 25.3 | 24.4 | 24.1 | 0.87    |
| Total dairy, servings/day          | 1.9               | 2.1  | 2.2  | 2.2  | <0.001  |
| Whole fat dairy, servings/day      | 0.77              | 0.94 | 1.01 | 1.10 | <0.001  |
| Low fat dairy, servings/day        | 1.2               | 1.2  | 1.1  | 1.1  | 0.14    |
| Processed meats, servings/day      | 0.25              | 0.24 | 0.29 | 0.25 | 0.44    |
| Unprocessed meats, servings/day    | 0.92              | 0.93 | 0.91 | 0.91 | 0.19    |
| Fruits, servings/day               | 1.7               | 1.8  | 1.7  | 1.8  | 0.03    |
| Vegetables, servings/day           | 4.0               | 4.0  | 3.9  | 3.9  | 0.17    |
| Fish, servings/day                 | 0.29              | 0.31 | 0.28 | 0.28 | 0.20    |
| Alcohol, servings/day              | 0.98              | 0.67 | 0.58 | 0.47 | <0.001  |

|                                    | Quartiles of t-16:1n-7 |      |      |      | P-trend |
|------------------------------------|------------------------|------|------|------|---------|
|                                    | Q1                     | Q2   | Q3   | Q4   |         |
| Median, % of total fatty acids     | 0.12                   | 0.15 | 0.19 | 0.25 | -       |
| Age, years                         | 61.8                   | 61.7 | 62.0 | 63.0 | <0.01   |
| Sex, % male                        | 17.0                   | 18.5 | 23.0 | 37.8 | <0.001  |
| Race, % Caucasian                  | 98.6                   | 98.5 | 98.6 | 98.2 | 0.61    |
| Body mass index, kg/m <sup>2</sup> | 25.9                   | 25.5 | 25.5 | 25.2 | <0.001  |
| Overweight or obese, %             | 54.4                   | 49.2 | 49.2 | 46.2 | <0.01   |
| Current smoking, %                 | 9.4                    | 12.0 | 8.6  | 8.5  | 0.17    |
| Physical activity, MET-hours/week  | 25.8                   | 24.9 | 24.7 | 24.6 | 0.54    |
| Hypertension, %                    | 22.0                   | 21.6 | 20.8 | 22.2 | 0.87    |
| Hypercholesterolemia, %            | 34.8                   | 30.0 | 27.8 | 28.1 | 0.01    |
| Parental MI before 60 y, %         | 15.5                   | 15.6 | 14.6 | 15.6 | 0.98    |
| Family history of diabetes, %      | 26.4                   | 22.6 | 25.3 | 23.5 | 0.34    |
| Total dairy, servings/day          | 1.9                    | 2.0  | 2.2  | 2.3  | <0.001  |
| Whole fat dairy, servings/day      | 0.71                   | 0.86 | 1.01 | 1.21 | <0.001  |
| Low fat dairy, servings/day        | 1.2                    | 1.2  | 1.2  | 1.1  | <0.001  |
| Processed meats, servings/day      | 0.26                   | 0.25 | 0.28 | 0.25 | 0.48    |
| Unprocessed meats, servings/day    | 0.95                   | 0.93 | 0.92 | 0.88 | <0.001  |
| Fruits, servings/day               | 1.8                    | 1.8  | 1.8  | 1.7  | 0.13    |
| Vegetables, servings/day           | 4.1                    | 3.9  | 3.9  | 3.9  | 0.49    |
| Fish, servings/day                 | 0.31                   | 0.30 | 0.28 | 0.27 | <0.01   |
| Alcohol, servings/day              | 0.87                   | 0.74 | 0.64 | 0.48 | <0.001  |

|                                    | Quartiles of 14:0 |      |      |      | P-trend |
|------------------------------------|-------------------|------|------|------|---------|
|                                    | Q1                | Q2   | Q3   | Q4   |         |
| Median, % of total fatty acids     | 0.24              | 0.42 | 0.61 | 0.94 | -       |
| Age, years                         | 61.6              | 61.9 | 62.9 | 62.2 | 0.11    |
| Sex, % male                        | 12.1              | 21.5 | 27.2 | 37.6 | 0.02    |
| Race, % Caucasian                  | 98.5              | 97.9 | 98.6 | 98.8 | 0.30    |
| Body mass index, kg/m <sup>2</sup> | 24.9              | 25.4 | 25.9 | 25.9 | <0.001  |
| Overweight or obese, %             | 42.1              | 45.8 | 53.1 | 56.3 | <0.001  |
| Current smoking, %                 | 6.4               | 9.7  | 10.1 | 11.9 | <0.01   |
| Physical activity, MET-hours/week  | 24.2              | 25.6 | 24.6 | 25.5 | 0.56    |
| Hypertension, %                    | 20.3              | 20.9 | 22.6 | 22.6 | 0.38    |
| Hypercholesterolemia, %            | 29.3              | 28.6 | 30.7 | 31.4 | 0.46    |
| Parental MI before 60 y, %         | 16.2              | 16.9 | 15.2 | 13.4 | 0.16    |
| Family history of diabetes, %      | 22.9              | 23.0 | 24.2 | 27.7 | 0.05    |
| Total dairy, servings/day          | 2.1               | 2.0  | 2.1  | 2.2  | <0.01   |
| Whole fat dairy, servings/day      | 0.88              | 0.89 | 0.95 | 1.08 | <0.01   |
| Low fat dairy, servings/day        | 1.2               | 1.1  | 1.2  | 1.1  | 0.55    |
| Processed meats, servings/day      | 0.27              | 0.26 | 0.26 | 0.25 | 0.19    |
| Unprocessed meats, servings/day    | 0.94              | 0.93 | 0.92 | 0.89 | <0.01   |
| Fruits, servings/day               | 1.7               | 1.7  | 1.8  | 1.7  | 0.94    |
| Vegetables, servings/day           | 4.1               | 4.0  | 3.9  | 3.8  | 0.01    |
| Fish, servings/day                 | 0.30              | 0.30 | 0.29 | 0.27 | 0.01    |
| Alcohol, servings/day              | 0.76              | 0.76 | 0.69 | 0.51 | <0.001  |



**Table S3. Partial Spearman correlations between plasma fatty acid biomarkers of dairy fat and dietary factors among 3,333 participants in the Nurses' Health Study and Health Professionals Follow-Up Study.\***

|                                | Plasma fatty acids |       |           |       |
|--------------------------------|--------------------|-------|-----------|-------|
|                                | 15:0               | 17:0  | t-16:1n-7 | 14:0  |
| Dietary Factors†               |                    |       |           |       |
| Dairy fat                      | 0.29               | 0.21  | 0.22      | 0.11  |
| Whole-fat dairy                | 0.26               | 0.19  | 0.24      | 0.06  |
| Low-fat dairy                  | 0.13               | 0.08  | 0.06      | 0.04  |
| Sugar-sweetened beverages      | 0.07               | 0.03  | 0.07      | 0.04  |
| Refined grains                 | 0.07               | 0.04  | 0.01      | 0.03  |
| Sweets/desserts                | 0.03               | 0.02  | 0.08      | -0.00 |
| Alcohol                        | -0.17              | -0.26 | -0.10     | 0.02  |
| French fries                   | 0.00               | 0.01  | 0.06      | -0.01 |
| Potato (baked, boiled, mashed) | -0.01              | 0.00  | 0.00      | -0.00 |
| Potato or corn chips           | -0.04              | -0.05 | -0.01     | -0.02 |
| Processed meat                 | 0.01               | 0.07  | 0.07      | -0.01 |
| Unprocessed meat               | 0.01               | 0.08  | 0.08      | -0.05 |
| Plasma Fatty Acids‡            |                    |       |           |       |
| 15:0                           | 1.0                | 0.57  | 0.50      | 0.59  |
| 17:0                           |                    | 1.0   | 0.50      | 0.10  |
| t-16:1n-7                      |                    |       | 1.0       | 0.20  |
| 14:0                           |                    |       |           | 1.0   |

\*Values are adjusted Spearman correlations based on pooling of individual-level data from both cohorts.

†Dietary habits were assessed using the average of self-reported consumption in 1986 and 1990 in the NHS, and 1990 and 1994 in the HPFS. Correlations with diet (N=2,717 due to missing dietary questionnaire data in some participants) were adjusted for age (years), sex, body mass index (kg/m<sup>2</sup>), smoking (never, current, former, missing), fasting status at blood draw, consumption of total energy (kcal/day), and each of the other dietary factor in the table simultaneously. Dairy fat was excluded as a covariate when evaluating whole-fat or low-fat dairy foods.

‡Fatty acid intercorrelations (N=3,289) were adjusted for age and sex.

**Table S4. Partial Spearman correlations between red blood cell fatty acids and dietary factors among 3,289 women and men in the Nurses' Health Study and Health Professionals Follow-Up Study.\***

|                                  | Erythrocyte fatty acids |       |           |       |
|----------------------------------|-------------------------|-------|-----------|-------|
|                                  | 15:0                    | 17:0  | t-16:1n-7 | 14:0  |
| Dietary factors†                 |                         |       |           |       |
| Dairy fat                        | 0.16                    | 0.11  | 0.20      | 0.10  |
| Whole-fat dairy                  | 0.16                    | 0.13  | 0.21      | 0.08  |
| Low-fat dairy                    | 0.06                    | 0.04  | 0.07      | 0.02  |
| Sugar-sweetened beverages        | 0.04                    | 0.02  | 0.04      | 0.04  |
| Refined grains                   | 0.03                    | -0.01 | 0.00      | 0.02  |
| Sweets/desserts                  | 0.01                    | 0.01  | 0.06      | 0.01  |
| Alcohol                          | -0.10                   | -0.17 | -0.09     | 0.02  |
| French fries                     | 0.00                    | 0.03  | 0.02      | -0.01 |
| Potatoes (baked, boiled, mashed) | 0.01                    | 0.01  | 0.04      | -0.01 |
| Potato or corn chips             | -0.03                   | -0.04 | -0.02     | -0.02 |
| Processed meat                   | 0.03                    | 0.07  | 0.06      | 0.02  |
| Unprocessed meat                 | 0.01                    | 0.06  | 0.05      | 0.00  |
| Erythrocyte fatty acids‡         |                         |       |           |       |
| 15:0                             | 1.0                     | 0.63  | 0.63      | 0.68  |
| 17:0                             |                         | 1.0   | 0.69      | 0.47  |
| t-16:1n-7                        |                         |       | 1.0       | 0.48  |
| 14:0                             |                         |       |           | 1.0   |

\*Values are adjusted Spearman correlations based on pooling of individual-level data from both cohorts. Compared with plasma fatty acids (N=3,333), 44 fewer subjects (N=3,289) had successful measures of erythrocyte fatty acids.

†Dietary habits were assessed using the average of self-reported consumption in 1986 and 1990 in the NHS, and 1990 and 1994 in the HPFS. Correlations with diet (N=2,717 due to missing dietary questionnaire data in some participants) were adjusted for age (years), sex, body mass index (kg/m<sup>2</sup>), smoking (never, current, former, missing), fasting status at blood draw, consumption of total energy (kcal/day), and each of the other dietary factor in the table simultaneously. Dairy fat was excluded as a covariate when evaluating whole-fat or low-fat dairy foods.

‡Fatty acid intercorrelations (N=3,289) were adjusted for age and sex.

**Table S5. Risk of incident diabetes according to red blood cell fatty acid biomarkers of dairy fat consumption among 3,289 men and women in the NHS (N=179 cases), HPFS (N=97 cases), and both cohorts combined.**

| Fatty acid                           | Cohort-specific fatty acid quartiles |                         |                         |                         | P for trend*     |
|--------------------------------------|--------------------------------------|-------------------------|-------------------------|-------------------------|------------------|
|                                      | 1                                    | 2                       | 3                       | 4                       |                  |
| 15:0, NHS                            |                                      |                         |                         |                         |                  |
| % of total FA, median                | 0.08                                 | 0.11                    | 0.14                    | 0.18                    |                  |
| No. of cases                         | 43                                   | 38                      | 53                      | 45                      |                  |
| Person-months                        | 85,143                               | 85,284                  | 89,701                  | 99,253                  |                  |
| Multivariable hazard ratio (95%CI) † | Reference                            | 0.73 (0.46-1.16)        | 0.93 (0.60-1.43)        | 0.65 (0.39-1.09)        | 0.20             |
| 15:0, HPFS                           |                                      |                         |                         |                         |                  |
| % of total FA, median                | 0.07                                 | 0.09                    | 0.12                    | 0.16                    |                  |
| No. of cases                         | 20                                   | 21                      | 26                      | 30                      |                  |
| Person-months                        | 58,160                               | 57,184                  | 60,933                  | 57,792                  |                  |
| Multivariable hazard ratio (95%CI)   | Reference                            | 0.87 (0.46-1.65)        | 1.09 (0.58-2.05)        | 1.27 (0.65-2.48)        | 0.35             |
| <b>15:0, pooled</b>                  | <b>Reference</b>                     | <b>0.78 (0.53-1.13)</b> | <b>0.98 (0.68-1.40)</b> | <b>0.83 (0.55-1.25)</b> | <b>0.63</b>      |
| 17:0, NHS                            |                                      |                         |                         |                         |                  |
| % of total FA, median                | 0.31                                 | 0.37                    | 0.42                    | 0.59                    |                  |
| No. of cases                         | 65                                   | 46                      | 23                      | 45                      |                  |
| Person-months                        | 84,278                               | 90,276                  | 85,591                  | 99,236                  |                  |
| Multivariable hazard ratio (95%CI)   | Reference                            | 0.66 (0.44-0.98)        | 0.30 (0.18-0.49)        | 0.37 (0.20-0.66)        | <0.001           |
| 17:0, HPFS                           |                                      |                         |                         |                         |                  |
| % of total FA, median                | 0.29                                 | 0.34                    | 0.38                    | 0.48                    |                  |
| No. of cases                         | 25                                   | 23                      | 19                      | 30                      |                  |
| Person-months                        | 58,563                               | 54,066                  | 61,510                  | 59,930                  |                  |
| Multivariable hazard ratio (95%CI)   | Reference                            | 0.88 (0.49-1.61)        | 0.54 (0.28-1.04)        | 0.99 (0.47-2.09)        | 0.90             |
| <b>17:0, pooled</b>                  | <b>Reference</b>                     | <b>0.72 (0.52-1.01)</b> | <b>0.37 (0.25-0.56)</b> | <b>0.54 (0.34-0.87)</b> | <b>&lt;0.001</b> |
| t-16:1n-7, NHS                       |                                      |                         |                         |                         |                  |
| % of total FA, median                | 0.11                                 | 0.14                    | 0.17                    | 0.22                    |                  |
| No. of cases                         | 47                                   | 52                      | 35                      | 45                      |                  |
| Person-months                        | 83,002                               | 86,211                  | 89,095                  | 101,073                 |                  |
| Multivariable hazard ratio (95%CI)   | Reference                            | 1.03 (0.69-1.54)        | 0.65 (0.41-1.02)        | 0.60 (0.36-1.02)        | 0.02             |

|                                    |                  |                         |                         |                         |             |
|------------------------------------|------------------|-------------------------|-------------------------|-------------------------|-------------|
| t-16:1n-7, HPFS                    |                  |                         |                         |                         |             |
| % of total FA, median              | 0.09             | 0.12                    | 0.14                    | 0.18                    |             |
| No. of cases                       | 20               | 26                      | 19                      | 32                      |             |
| Person-months                      | 58,671           | 57,636                  | 57,138                  | 60,624                  |             |
| Multivariable hazard ratio (95%CI) | Reference        | 1.31 (0.72-2.39)        | 0.82 (0.42-1.59)        | 1.21 (0.61-2.39)        | 0.80        |
| <b>t-16:1n-7, pooled</b>           | <b>Reference</b> | <b>1.11 (0.80-1.55)</b> | <b>0.70 (0.48-1.02)</b> | <b>0.78 (0.51-1.18)</b> | <b>0.05</b> |
| 14:0, NHS                          |                  |                         |                         |                         |             |
| % of total FA, median              | 0.11             | 0.20                    | 0.31                    | 0.64                    |             |
| No. of cases                       | 32               | 50                      | 37                      | 60                      |             |
| Person-months                      | 80,336           | 85,653                  | 92,087                  | 101,305                 |             |
| Multivariable hazard ratio (95%CI) | Reference        | 1.18 (0.74-1.87)        | 0.76 (0.45-1.29)        | 1.08 (0.61-1.88)        | 0.82        |
| 14:0, HPFS                         |                  |                         |                         |                         |             |
| % of total FA, median              | 0.12             | 0.21                    | 0.31                    | 0.53                    |             |
| No. of cases                       | 14               | 20                      | 30                      | 33                      |             |
| Person-months                      | 57,996           | 58,816                  | 60,816                  | 56,441                  |             |
| Multivariable hazard ratio (95%CI) | Reference        | 1.49 (0.70-3.14)        | 2.29 (1.10-4.78)        | 3.43 (1.51-7.77)        | 0.001       |
| <b>14:0, pooled</b>                | <b>Reference</b> | <b>1.26 (0.85-1.87)</b> | <b>1.11 (0.72-1.70)</b> | <b>1.56 (0.98-2.49)</b> | <b>0.13</b> |

\*Computed within each cohort by assigning the median level in each quartile to participants and evaluating this as a continuous variable. The pooled P-for-trend was calculated using generalized least squares trend (GLST) meta-analysis.<sup>10</sup>

†Adjusted for age (years), race (white, nonwhite), smoking status (never, former, current, missing), physical activity (METS/week), alcohol (servings/day), family history of diabetes (yes, no, missing), parental history of MI (yes, no, missing), hypercholesterolemia (yes, no), hypertension (yes, no), menopausal status in NHS (pre, post), postmenopausal hormone use in NHS (no, yes, missing), and consumption of fish (servings/day), processed meats (servings/day), unprocessed meats (servings/day), fruits (servings/day), vegetables (servings/day), whole grains (g/day), coffee (servings/day), sugar-sweetened beverages (servings/day), glycemic load (continuous), dietary calcium (mg/day), polyunsaturated fat (g/day), total energy (kcal/day), and plasma trans-18:1, trans-18:2, 16:0, and 18:0 (each as % of total fatty acids).

**Table S6. Risk of incident diabetes according to red blood cell fatty acid biomarkers, evaluated continuously, among 3,289 men and women in the Nurses' Health Study (N=179 cases), Health Professionals Follow-Up Study (N=97 cases), and both cohorts combined.**

| Fatty acids                | Results standardized to the difference between the midpoints<br>of the highest vs. lowest quartiles (87.5 <sup>th</sup> minus 12.5 <sup>th</sup> percentiles) |                  |                         |                  |
|----------------------------|---------------------------------------------------------------------------------------------------------------------------------------------------------------|------------------|-------------------------|------------------|
|                            | NHS                                                                                                                                                           | HPFS             | Pooled                  | P-value          |
| <b>15:0</b>                | range = 0.10*                                                                                                                                                 | range = 0.10     |                         |                  |
| Multivariable HR (95%CI) † | 0.75 (0.50-1.12)                                                                                                                                              | 1.33 (0.98-1.80) | <b>1.08 (0.85-1.38)</b> | <b>0.53</b>      |
| + BMI ‡                    | 0.73 (0.48-1.12)                                                                                                                                              | 1.37 (1.01-1.86) | <b>1.11 (0.86-1.42)</b> | <b>0.43</b>      |
| <b>17:0</b>                | range = 0.28                                                                                                                                                  | range = 0.19     |                         |                  |
| Multivariable HR (95%CI)   | 0.42 (0.26-0.68)                                                                                                                                              | 0.66 (0.29-1.53) | <b>0.47 (0.31-0.71)</b> | <b>&lt;0.001</b> |
| + BMI                      | 0.57 (0.31-1.04)                                                                                                                                              | 0.88 (0.38-2.06) | <b>0.66 (0.40-1.08)</b> | <b>0.10</b>      |
| <b>t-16:1n-7</b>           | range = 0.11                                                                                                                                                  | range = 0.09     |                         |                  |
| Multivariable HR (95%CI)   | 0.76 (0.49-1.17)                                                                                                                                              | 0.87 (0.50-1.53) | <b>0.80 (0.57-1.13)</b> | <b>0.20</b>      |
| + BMI                      | 0.86 (0.55-1.35)                                                                                                                                              | 0.95 (0.53-1.70) | <b>0.89 (0.63-1.27)</b> | <b>0.53</b>      |
| <b>14:0</b>                | Range = 0.53                                                                                                                                                  | Range = 0.41     |                         |                  |
| Multivariable HR (95%CI)   | 1.23 (0.98-1.54)                                                                                                                                              | 2.11 (1.31-3.39) | <b>1.36 (1.11-1.67)</b> | <b>0.003</b>     |
| + BMI                      | 1.16 (0.91-1.46)                                                                                                                                              | 2.11 (1.30-3.42) | <b>1.30 (1.05-1.61)</b> | <b>0.02</b>      |

\*The difference in % of total fatty acids between the midpoint of the highest vs. lowest quartile.

† Adjusted for age (years), race (white, nonwhite), smoking status (never, former, current, missing), physical activity (METS/week), alcohol (servings/day), family history of diabetes (yes, no, missing), parental history of MI (yes, no, missing), hypercholesterolemia (yes, no), hypertension (yes, no), menopausal status in NHS (pre, post), postmenopausal hormone use in NHS (no, yes, missing), and consumption of fish (servings/day), processed meats (servings/day), unprocessed meats (servings/day), fruits (servings/day), vegetables (servings/day), whole grains (g/day), coffee (servings/day), sugar-sweetened beverages (servings/day), glycemic load (continuous), dietary calcium (mg/day), polyunsaturated fat (g/day), total energy (kcal/day), and plasma trans-18:1, trans-18:2, 16:0, and 18:0 (each as % of total fatty acids).

‡ Further adjusted for body mass index (BMI, kg/m<sup>2</sup>) as a potential mediator of confounder of the association.

**Table S7. Risk of incident diabetes according to plasma fatty acid biomarkers of dairy fat after further adjustment for self-reported consumption of yogurt, cheese, or dairy fat as covariates in the NHS (N=184 cases), HPFS (N=93 cases), and both cohorts combined.**

|                  | Multivariable HR (95%CI) per increase in difference of the midpoint of the highest versus lowest quartiles (87.5 <sup>th</sup> minus 12.5 <sup>th</sup> percentiles) |                         |                         |                         |
|------------------|----------------------------------------------------------------------------------------------------------------------------------------------------------------------|-------------------------|-------------------------|-------------------------|
|                  | Main results                                                                                                                                                         | Adding yogurt           | Adding cheese           | Adding dairy fat        |
| <b>15:0</b>      |                                                                                                                                                                      |                         |                         |                         |
| NHS              | 0.63 (0.42-0.92)                                                                                                                                                     | 0.63 (0.43-0.94)        | 0.63 (0.42-0.93)        | 0.63 (0.42-0.94)        |
| HPFS             | 0.61 (0.36-1.03)                                                                                                                                                     | 0.62 (0.36-1.06)        | 0.60 (0.35-1.03)        | 0.56 (0.32-0.97)        |
| <b>Pooled</b>    | <b>0.62 (0.46-0.85)</b>                                                                                                                                              | <b>0.63 (0.46-0.86)</b> | <b>0.62 (0.45-0.85)</b> | <b>0.61 (0.44-0.84)</b> |
| <b>17:0</b>      |                                                                                                                                                                      |                         |                         |                         |
| NHS              | 0.71 (0.49-1.04)                                                                                                                                                     | 0.72 (0.49-1.05)        | 0.72 (0.49-1.04)        | 0.72 (0.50-1.05)        |
| HPFS             | 0.63 (0.39-1.02)                                                                                                                                                     | 0.64 (0.39-1.03)        | 0.63 (0.39-1.02)        | 0.60 (0.37-0.99)        |
| <b>Pooled</b>    | <b>0.68 (0.50-0.91)</b>                                                                                                                                              | <b>0.69 (0.51-0.93)</b> | <b>0.68 (0.51-0.92)</b> | <b>0.67 (0.50-0.91)</b> |
| <b>t-16:1n-7</b> |                                                                                                                                                                      |                         |                         |                         |
| NHS              | 0.52 (0.36-0.76)                                                                                                                                                     | 0.53 (0.36-0.76)        | 0.52 (0.36-0.76)        | 0.53 (0.36-0.77)        |
| HPFS             | 0.58 (0.36-0.93)                                                                                                                                                     | 0.57 (0.35-0.92)        | 0.55 (0.34-0.90)        | 0.49 (0.30-0.82)        |
| <b>Pooled</b>    | <b>0.54 (0.40-0.73)</b>                                                                                                                                              | <b>0.55 (0.41-0.73)</b> | <b>0.53 (0.40-0.71)</b> | <b>0.52 (0.38-0.70)</b> |
| <b>14:0</b>      |                                                                                                                                                                      |                         |                         |                         |
| NHS              | 0.92 (0.64-1.32)                                                                                                                                                     | 0.94 (0.65-1.35)        | 0.92 (0.64-1.33)        | 0.93 (0.64-1.34)        |
| HPFS             | 0.61 (0.35-1.09)                                                                                                                                                     | 0.63 (0.35-1.11)        | 0.61 (0.34-1.08)        | 0.56 (0.31-1.01)        |
| <b>Pooled</b>    | <b>0.82 (0.60-1.11)</b>                                                                                                                                              | <b>0.84 (0.62-1.14)</b> | <b>0.82 (0.60-1.11)</b> | <b>0.81 (0.59-1.10)</b> |

Adjusted for age (years), race (white, nonwhite), smoking status (never, former, current, missing), physical activity (METS/week), alcohol (servings/day), family history of diabetes (yes, no, missing), parental history of MI (yes, no, missing), hypercholesterolemia (yes, no), hypertension (yes, no), menopausal status in NHS (pre, post), postmenopausal hormone use in NHS (no, yes, missing), and consumption of fish (servings/day), processed meats (servings/day), unprocessed meats (servings/day), fruits (servings/day), vegetables (servings/day), whole grains (g/day), coffee (servings/day), sugar-sweetened beverages (servings/day), glycemic load (continuous), dietary calcium (mg/day), polyunsaturated fat (g/day), total energy (kcal/day), and plasma trans-18:1, trans-18:2, 16:0, and 18:0 (each as % of total fatty acids).

**Table S8. Risk of incident diabetes according to plasma fatty acid biomarkers of dairy fat in sensitivity analyses excluding cases in the first 2 years of follow-up and restricting to the first 8 years of follow-up in the NHS (N=172 and 65 cases, respectively), HPFS (N=84 and 50 cases, respectively), and both cohorts combined.**

| Results standardized to the difference between the midpoints<br>of the highest vs. lowest quartiles (87.5 <sup>th</sup> minus 12.5 <sup>th</sup> percentiles) |                         |                                      |                                  |
|---------------------------------------------------------------------------------------------------------------------------------------------------------------|-------------------------|--------------------------------------|----------------------------------|
| Fatty Acids                                                                                                                                                   | Full follow-up          | Excluding cases in the first 2 years | Restricting to the first 8 years |
| <b>15:0</b>                                                                                                                                                   |                         |                                      |                                  |
| NHS                                                                                                                                                           | 0.63 (0.42-0.92)        | 0.65 (0.43-0.97)                     | 0.56 (0.29-1.06)                 |
| HPFS                                                                                                                                                          | 0.61 (0.36-1.03)        | 0.76 (0.45-1.29)                     | 0.71 (0.36-1.40)                 |
| <b>Pooled</b>                                                                                                                                                 | <b>0.62 (0.46-0.85)</b> | <b>0.69 (0.50-0.95)</b>              | <b>0.63 (0.39-1.00)</b>          |
| <b>17:0</b>                                                                                                                                                   |                         |                                      |                                  |
| NHS                                                                                                                                                           | 0.71 (0.49-1.04)        | 0.75 (0.51-1.10)                     | 0.66 (0.35-1.23)                 |
| HPFS                                                                                                                                                          | 0.63 (0.39-1.02)        | 0.72 (0.45-1.17)                     | 0.75 (0.40-1.39)                 |
| <b>Pooled</b>                                                                                                                                                 | <b>0.68 (0.50-0.91)</b> | <b>0.74 (0.55-1.00)</b>              | <b>0.70 (0.45-1.10)</b>          |
| <b>t-16:1n-7</b>                                                                                                                                              |                         |                                      |                                  |
| NHS                                                                                                                                                           | 0.52 (0.36-0.76)        | 0.58 (0.40-0.84)                     | 0.28 (0.15-0.54)                 |
| HPFS                                                                                                                                                          | 0.58 (0.36-0.93)        | 0.66 (0.39-1.09)                     | 0.59 (0.31-1.12)                 |
| <b>Pooled</b>                                                                                                                                                 | <b>0.54 (0.40-0.73)</b> | <b>0.61 (0.45-0.82)</b>              | <b>0.41 (0.26-0.64)</b>          |
| <b>14:0</b>                                                                                                                                                   |                         |                                      |                                  |
| NHS                                                                                                                                                           | 0.92 (0.64-1.32)        | 0.86 (0.59-1.25)                     | 1.08 (0.58-2.00)                 |
| HPFS                                                                                                                                                          | 0.61 (0.35-1.09)        | 0.67 (0.37-1.20)                     | 0.71 (0.34-1.48)                 |
| <b>Pooled</b>                                                                                                                                                 | <b>0.82 (0.60-1.11)</b> | <b>0.80 (0.58-1.10)</b>              | <b>0.91 (0.57-1.46)</b>          |

Values are hazard ratio (95%CI) adjusted for age (years), race (white, nonwhite), smoking status (never, former, current, missing), physical activity (METS/week), alcohol (servings/day), family history of diabetes (yes, no, missing), parental history of MI (yes, no, missing), hypercholesterolemia (yes, no), hypertension (yes, no), menopausal status in NHS (pre, post), postmenopausal hormone use in NHS (no, yes, missing), and consumption of fish (servings/day), processed meats (servings/day), unprocessed meats (servings/day), fruits (servings/day), vegetables (servings/day), whole grains (g/day), coffee (servings/day), sugar-sweetened beverages (servings/day), glycemic load (continuous), dietary calcium (mg/day), polyunsaturated fat (g/day), total energy (kcal/day), and plasma trans-18:1, trans-18:2, 16:0, and 18:0 (each as % of total fatty acids).

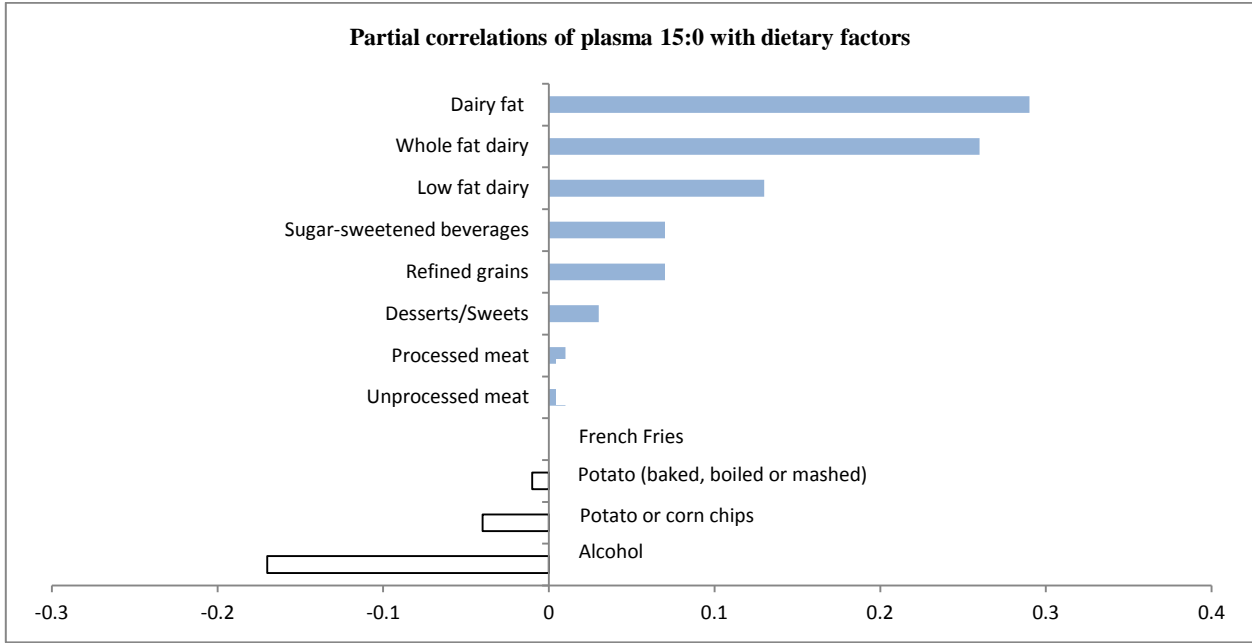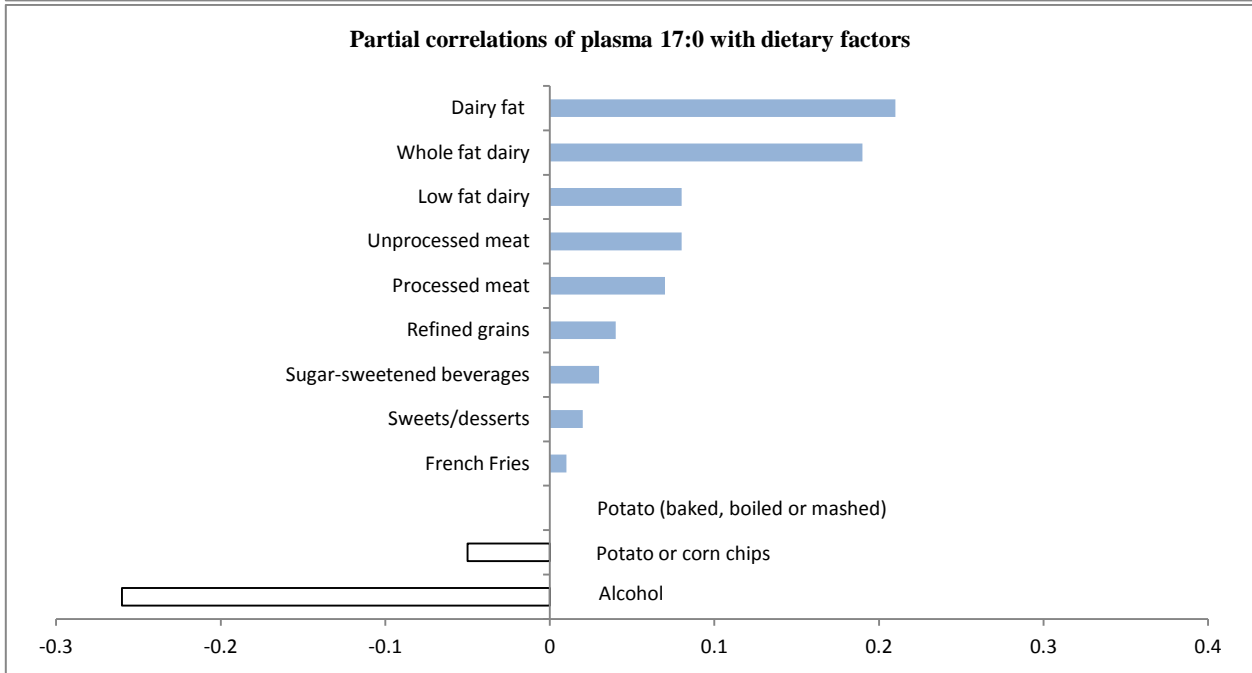



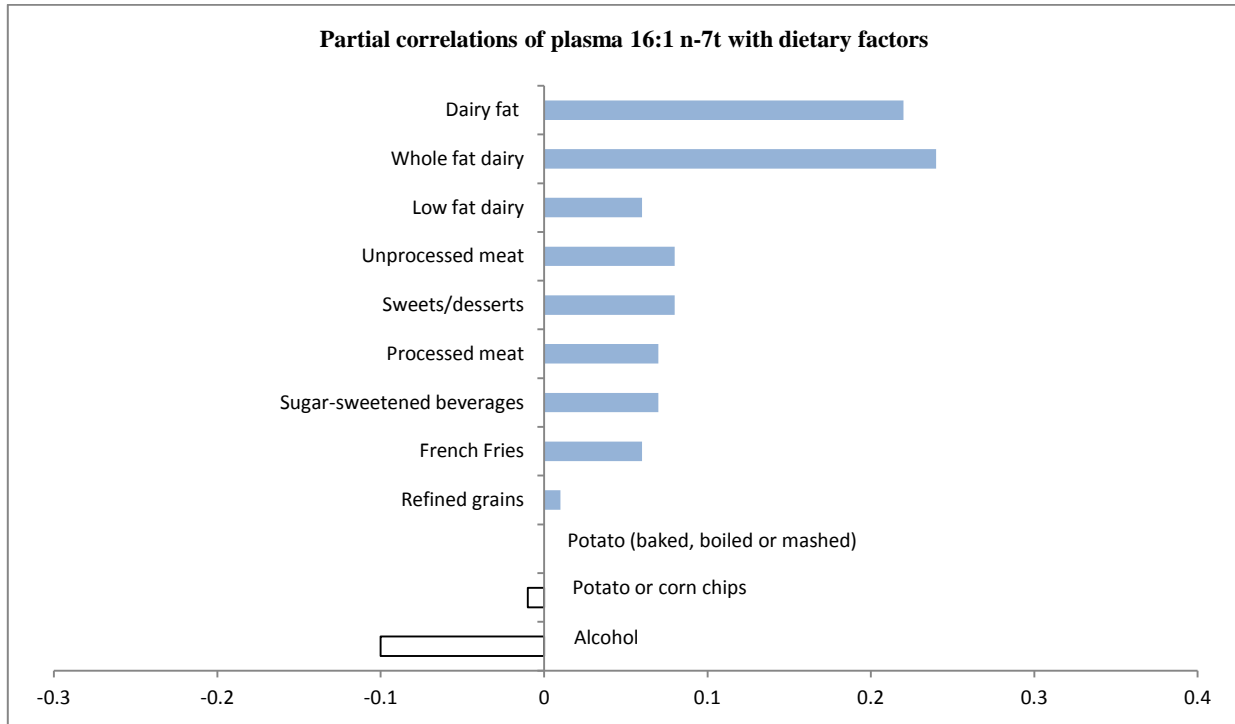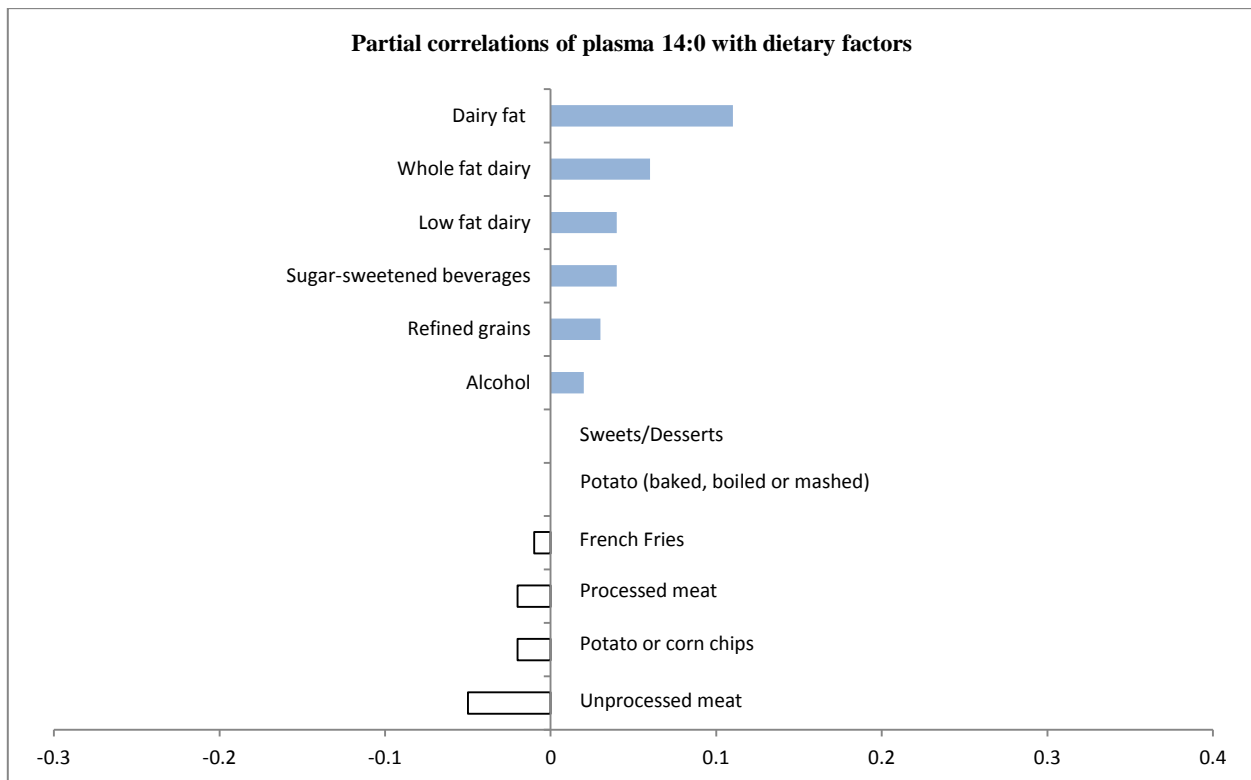

**Figure S1. Partial Spearman correlations between plasma fatty acid biomarkers of dairy fat and dietary habits in the Nurses' Health Study and Health Professionals Follow-Up Study.** Dietary habits assessed using the average of self-reported intake in 1986 and 1990 in NHS, and 1990 and 1994 in HPFS (total N=2,761). Correlations based on pooled individual-level data, adjusted for age (years), sex, body mass index ( $\text{kg}/\text{m}^2$ ), smoking (never, current, former, missing), fasting status at blood draw, consumption of total energy ( $\text{kcal}/\text{day}$ ), and each of the other dietary factor in the figure simultaneously. Dairy fat was excluded when evaluating whole-fat and low-fat dairy.

## REFERENCES

1. Zhang L, Curhan GC, Hu FB, Rimm EB and Forman JP. Association between passive and active smoking and incident type 2 diabetes in women. *Diabetes Care*. 2011;34:892-7.
2. Wolf AM, Hunter DJ, Colditz GA, Manson JE, Stampfer MJ, Corsano KA, Rosner B, Kriska A and Willett WC. Reproducibility and validity of a self-administered physical activity questionnaire. *Int J Epidemiol*. 1994;23:991-9.
3. Chasan-Taber S, Rimm EB, Stampfer MJ, Spiegelman D, Colditz GA, Giovannucci E, Ascherio A and Willett WC. Reproducibility and validity of a self-administered physical activity questionnaire for male health professionals. *Epidemiology*. 1996;7:81-6.
4. Zhang X, Smith-Warner SA, Chan AT, Wu K, Spiegelman D, Fuchs CS, Willett WC and Giovannucci EL. Aspirin use, body mass index, physical activity, plasma C-peptide, and colon cancer risk in US health professionals. *Am J Epidemiol*. 2011;174:459-67.
5. Feskanich D, Rimm EB, Giovannucci EL, Colditz GA, Stampfer MJ, Litin LB and Willett WC. Reproducibility and validity of food intake measurements from a semiquantitative food frequency questionnaire. *J Am Diet Assoc*. 1993;93:790-6.
6. Salvini S, Hunter DJ, Sampson L, Stampfer MJ, Colditz GA, Rosner B and Willett WC. Food-based validation of a dietary questionnaire: the effects of week-to-week variation in food consumption. *Int J Epidemiol*. 1989;18:858-67.
7. Rimm EB, Stampfer MJ, Colditz GA, Chute CG, Litin LB and Willett WC. Validity of self-reported waist and hip circumferences in men and women. *Epidemiology*. 1990;1:466-73.
8. Ascherio A, Rimm EB, Giovannucci EL, Colditz GA, Rosner B, Willett WC, Sacks F and Stampfer MJ. A prospective study of nutritional factors and hypertension among US men. *Circulation*. 1992;86:1475-84.
9. Colditz GA, Martin P, Stampfer MJ, Willett WC, Sampson L, Rosner B, Hennekens CH and Speizer FE. Validation of questionnaire information on risk factors and disease outcomes in a prospective cohort study of women. *Am J Epidemiol*. 1986;123:894-900.
10. Orsini N, Bellocco R and Greenland S. Generalized least squares for trend estimation of summarized dose-response data. *Stata J*. 2006;6:40-57.
